# Supplementary material
Source: PubMed Central journal article supplement (PMC6750906)
Supplement: NIHMS1023700-supplement-S1.pdf [file NIHMS1023700-supplement-S1.pdf]

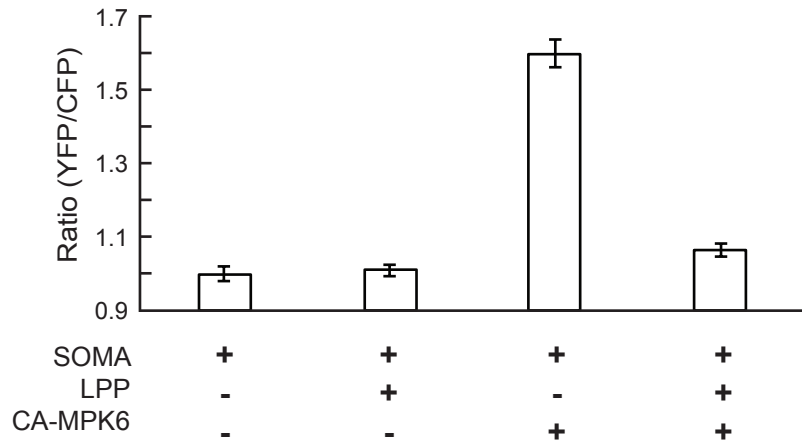

**Fig. S1. *In vitro* FRET assay with lambda protein phosphatase.**

*In vitro* FRET assays were performed using SOMA protein and constitutively active MPK6 (CA-MPK6) expressed in *E. coli*. The emission spectra of SOMA produced by excitation of the Turquoise GL domain with 435 nm light was collected using a scanning spectrofluorimeter and the peak values for YPet and Turquoise GL emission were recorded and the ratio of YPet to Turquoise GL emission was calculated. The components present in a given reaction are indicated with “+”. “LPP” indicates lambda protein phosphatase. “Ratio (YFP/CFP)” indicates the peak YPet emission divided by peak Turquoise GL emission. These values are normalized to the reaction containing only SOMA protein. Error bars indicate standard deviation of three independent samples.
