# Supplementary material
Source: PubMed Central journal article supplement (PMC6750906)
Supplement: NIHMS1023700-supplement-S2.pdf [file NIHMS1023700-supplement-S2.pdf]

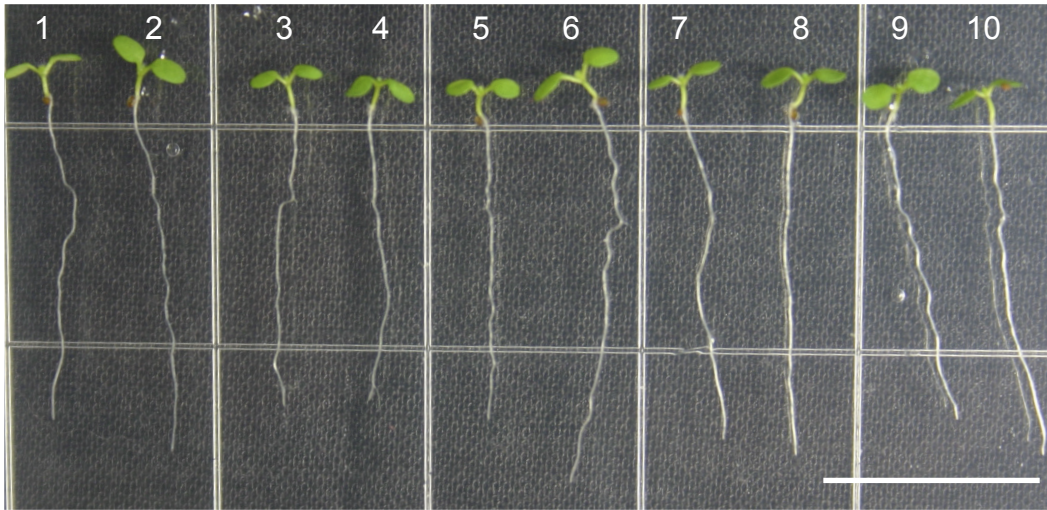

**Fig. S2. Seedling phenotypes of SOMA transgenic lines.**

Representative 7-day-old seedlings grown on vertically oriented agar plates under continuous light. Seedling genotypes are as follows: (1) Col-0, (2) SOMA-NLS-1, (3) SOMA-NLS-2, (4) SOMA-NES-1, (5) SOMA-NES-2, (6) SOMA-T679A-NLS-1, (7) SOMA-T679A-NLS-2, (8) SOMA-T679A-NES-1, (9) SOMA-T679A-NES-2, (10) MPK6-YG SOMA-NES. Scale bar is 1 cm.
