# Supplementary material
Source: PubMed Central journal article supplement (PMC6750906)
Supplement: NIHMS1023700-supplement-S7.pdf [file NIHMS1023700-supplement-S7.pdf]

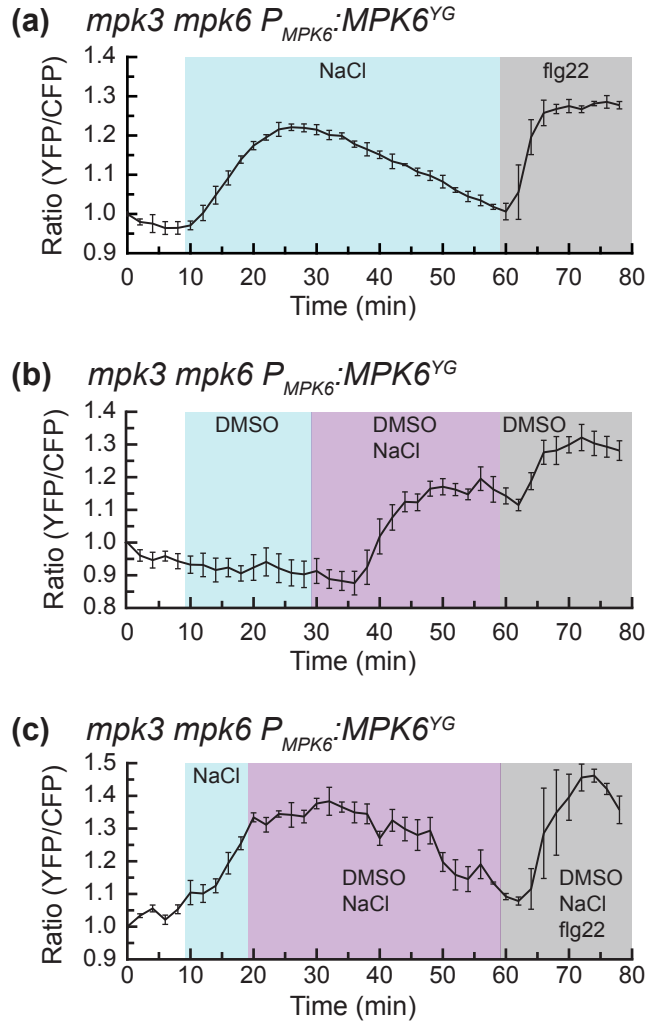

**Fig. S7. DMSO controls for SOMA-NES in *mpk3 mpk6 P<sub>mpk6</sub>::MPK6<sup>YG</sup>*.**

The response of the SOMA-NES to DMSO treatment in the *mpk3 mpk6 P<sub>mpk6</sub>::MPK6<sup>YG</sup>* genetic background was evaluated by analyzing cotyledon epidermal pavement cells. Graphs depict the average ratio of YPet to Turquoise GL emission produced by exciting Turquoise GL. The shaded background on each graph indicates when the sample was exposed to a given treatment. During the first ten minutes of each experiment the samples were incubated in pure water. “NaCl” indicates 150 mM NaCl, “DMSO” indicates 0.1% DMSO, “DMSO NaCl” indicates 0.1% DMSO + 150 mM NaCl, and “flg22” indicates 1  $\mu$ M flg22, and “DMSO NaCl flg22” indicates 0.1% DMSO + 150 mM NaCl + 1  $\mu$ M flg22 was present in the imaging chamber during the shaded time period. Error bars indicate standard deviation. “Ratio (YFP/CFP)” indicates the normalized value of YPet emission divided by Turquoise GL emission.
