# Supplementary material
Source: PubMed Central journal article supplement (PMC6750906)
Supplement: NIHMS1023700-supplement-S9.pdf [file NIHMS1023700-supplement-S9.pdf]

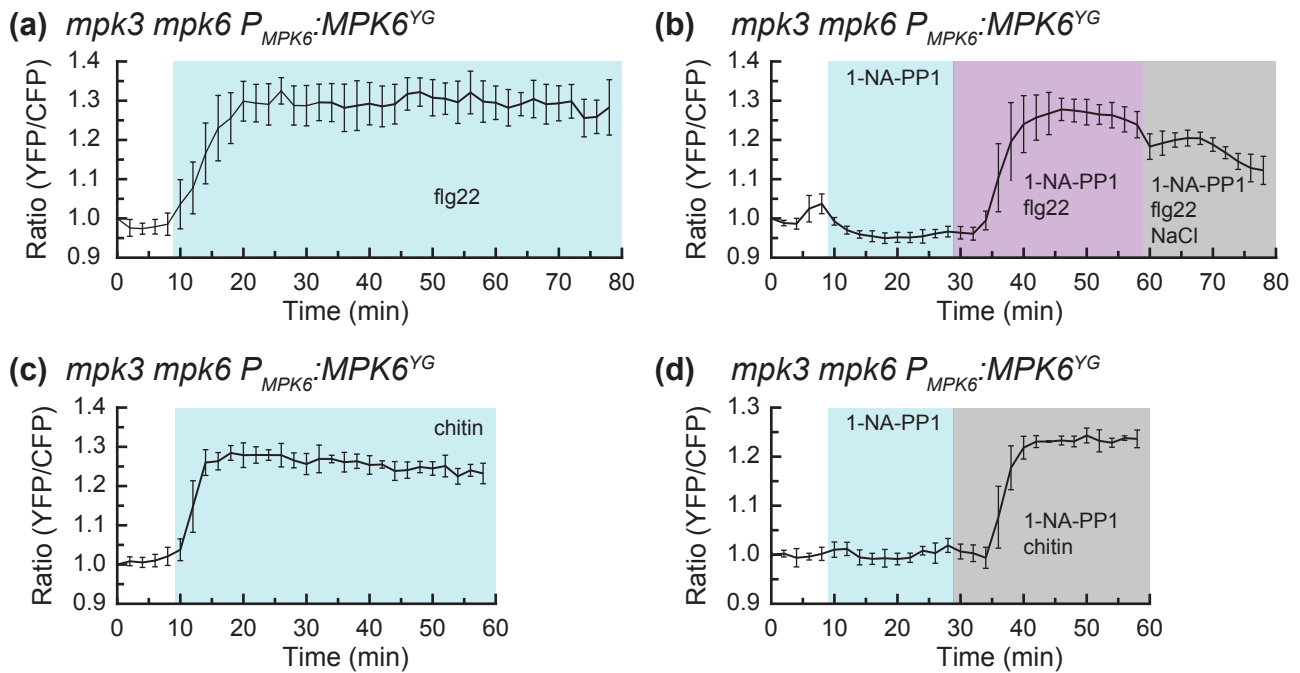

**Fig. S9. flg22 and chitin treatment of SOMA-NES in *mpk3 mpk6 P<sub>mpk6</sub>::MPK6<sup>YG</sup>*.** The effect of 1-NA-PP1 on the response of the SOMA-NES to flg22 and chitin treatment in the *mpk3 mpk6 P<sub>mpk6</sub>::MPK6<sup>YG</sup>* genetic background was evaluated by analyzing cotyledon epidermal pavement cells. Graphs depict the average ratio of YPet to Turquoise GL emission produced by exciting Turquoise GL. The shaded background on each graph indicates when the sample was exposed to a given treatment. During the first ten minutes of each experiment the samples were incubated in pure water. “flg22” indicates 1  $\mu$ M flg22, “chitin” indicates 40 mg/ml chitin, “1-NA-PP1” indicates 10  $\mu$ M 1-NA-PP1, “1-NA-PP1 flg22” indicates 10  $\mu$ M 1-NA-PP1 + 1  $\mu$ M flg22, “1-NA-PP1 chitin” indicates 10  $\mu$ M 1-NA-PP1 + 40 mg/ml chitin, and “1-NA-PP1 flg22 NaCl” indicates 10  $\mu$ M 1-NA-PP1 + 1  $\mu$ M flg22 + 150 mM NaCl were present in the imaging chamber during the shaded time period. Error bars indicate standard deviation. “Ratio (YFP/CFP)” indicates the normalized value of YPet emission divided by Turquoise GL emission.
