# Supplementary material
Source: PubMed Central journal article supplement (PMC6750906)
Supplement: NIHMS1023700-supplement-S10.pdf [file NIHMS1023700-supplement-S10.pdf]

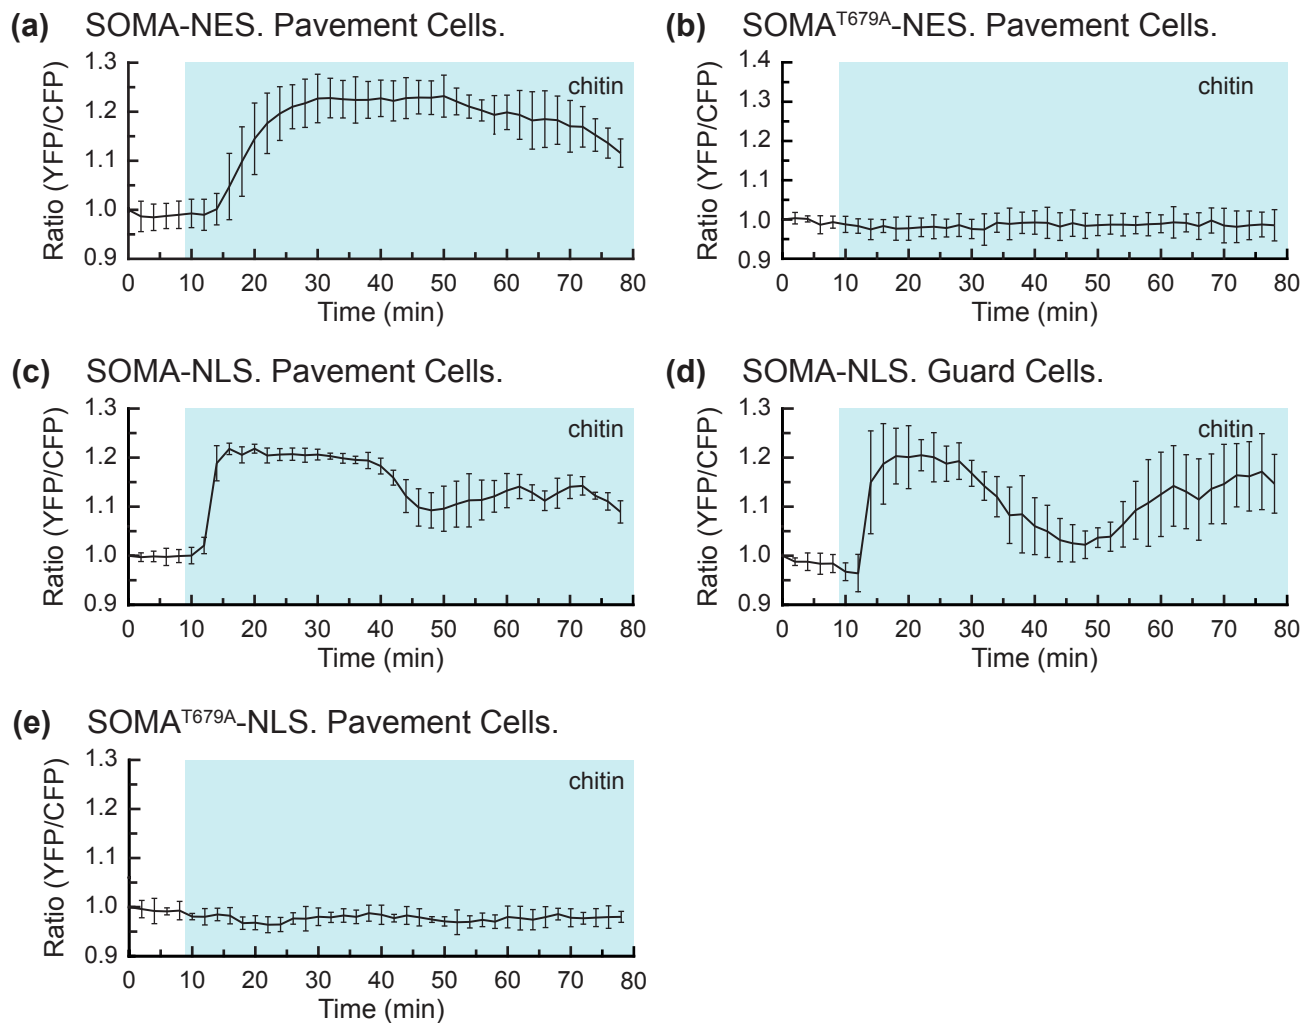

**Fig. S10. Chitin treatment of SOMA-NLS-2, SOMA-NES-2, SOMA<sup>T679A</sup>-NLS-2, and SOMA<sup>T679A</sup>-NES-2.**

The effect of chitin treatment on the indicated lines was evaluated by analyzing cotyledon epidermal cells. Graphs depict the average ratio of YPet to Turquoise GL emission produced by exciting Turquoise GL. The shaded background on each graph indicates when the sample was exposed to a given treatment. During the first ten minutes of each experiment the samples were incubated in pure water. “chitin” indicates that 40 mg/ml chitin was present in the imaging chamber during the shaded time period. Error bars indicate standard deviation. “Ratio (YFP/CFP)” indicates the normalized value of YPet emission divided by Turquoise GL emission.
