# Supplementary material
Source: PubMed Central journal article supplement (PMC6750906)
Supplement: NIHMS1023700-supplement-S17.pdf [file NIHMS1023700-supplement-S17.pdf]

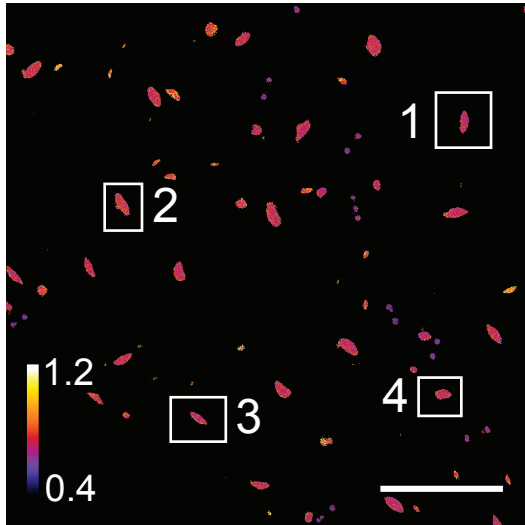

ROIs for Fig. 2G

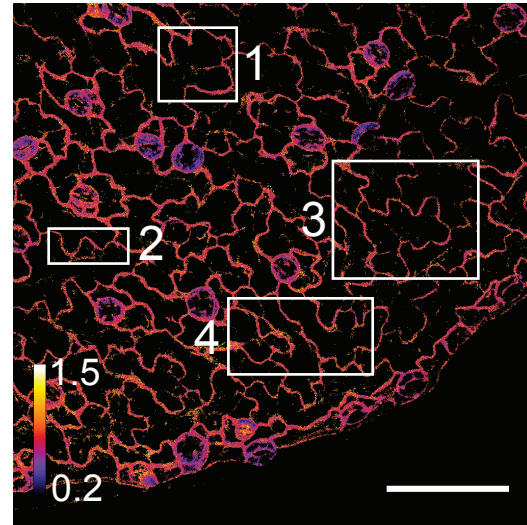

ROIs for Fig. 2H

**Fig. S17. ROIs for Figure 2.**

The ROIs used to collect YPet and Turquoise GL emission intensity values are indicated by white rectangles.
