# Supplementary material
Source: PubMed Central journal article supplement (PMC6750906)
Supplement: NIHMS1023700-supplement-S18.pdf [file NIHMS1023700-supplement-S18.pdf]

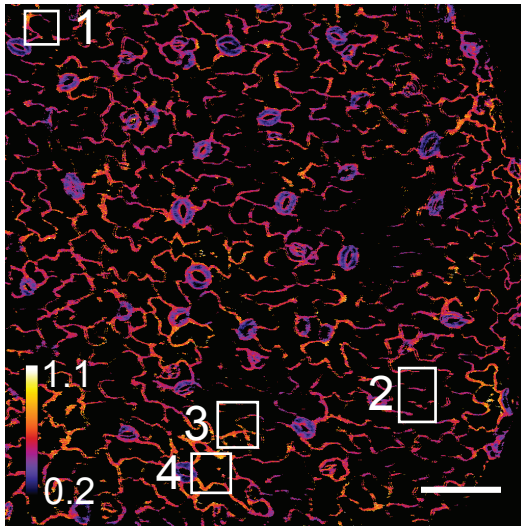

ROIs for Fig. 3A

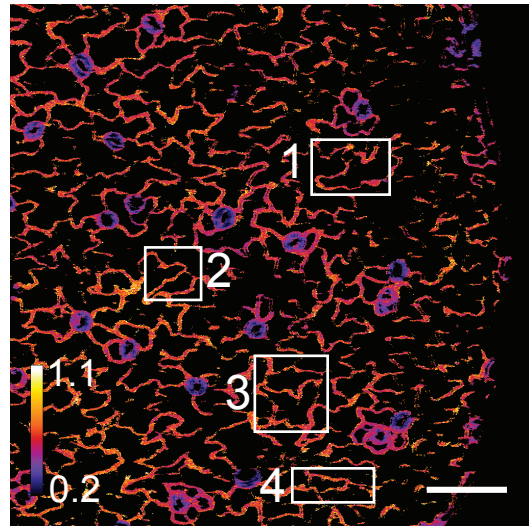

ROIs for Fig. 3B

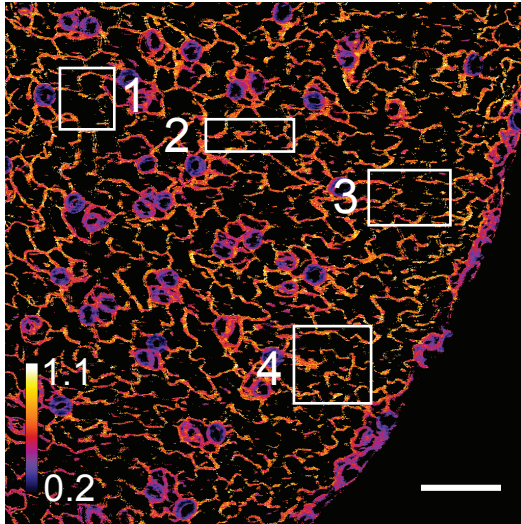

ROIs for Fig. 3C

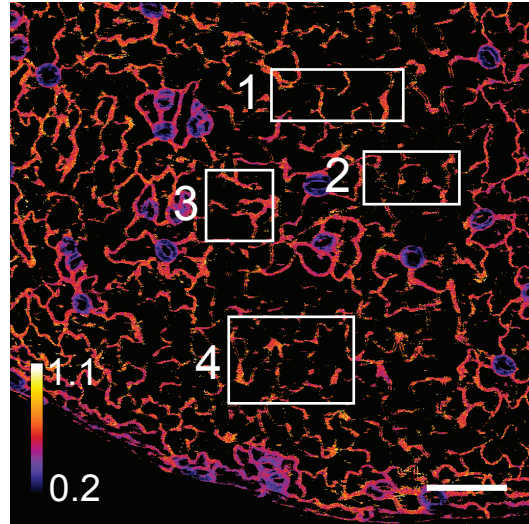

ROIs for Fig. 3D

**Fig. S18. ROIs for Figure 3.**

The ROIs used to collect YPet and Turquoise GL emission intensity values are indicated by white rectangles.
