# Supplementary material
Source: PubMed Central journal article supplement (PMC6750906)
Supplement: NIHMS1023700-supplement-S19.pdf [file NIHMS1023700-supplement-S19.pdf]

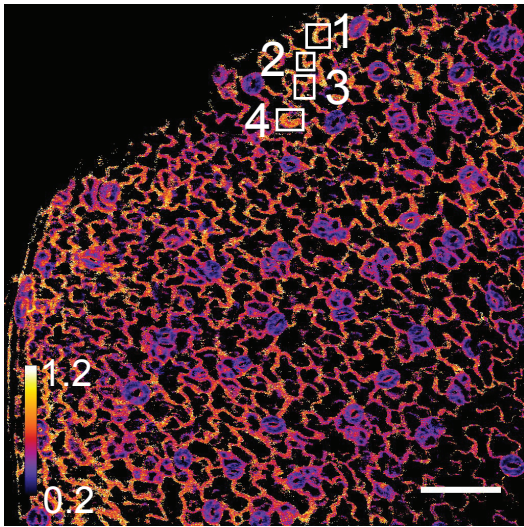

ROIs for Fig. 4A

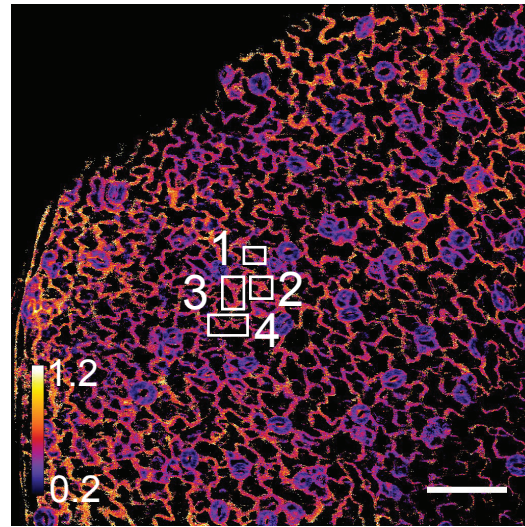

ROIs for Fig. 4B

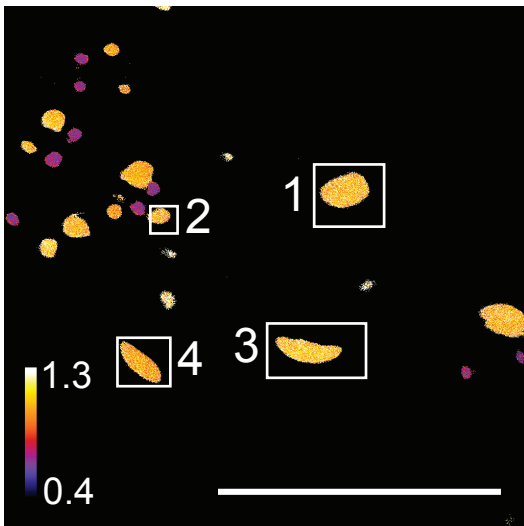

ROIs for Fig. 4C

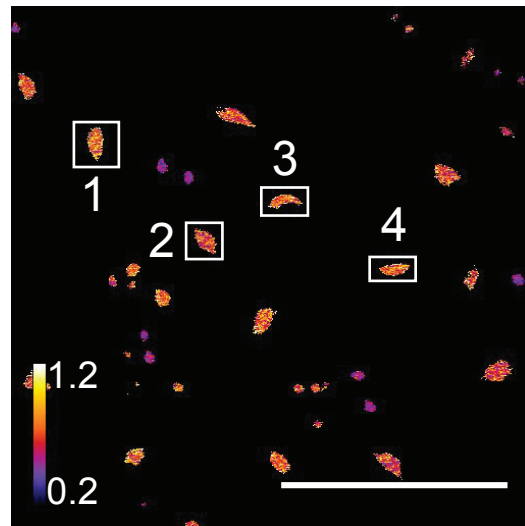

ROIs for Fig. 4D

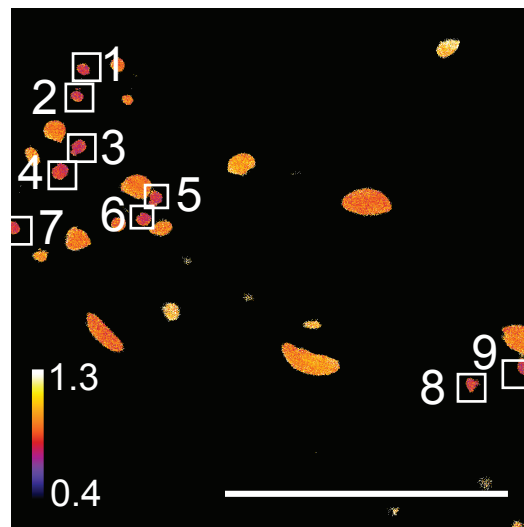

ROIs for Fig. 4E

**Fig. S19. ROIs for Figure 4.**

The ROIs used to collect YPet and Turquoise GL emission intensity values are indicated by white rectangles.
