# Supplementary material
Source: PubMed Central journal article supplement (PMC6750906)
Supplement: NIHMS1023700-supplement-S20.pdf [file NIHMS1023700-supplement-S20.pdf]

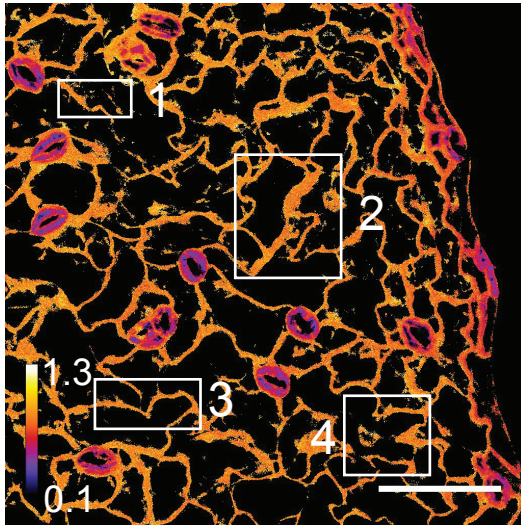

ROIs for Fig. 5A

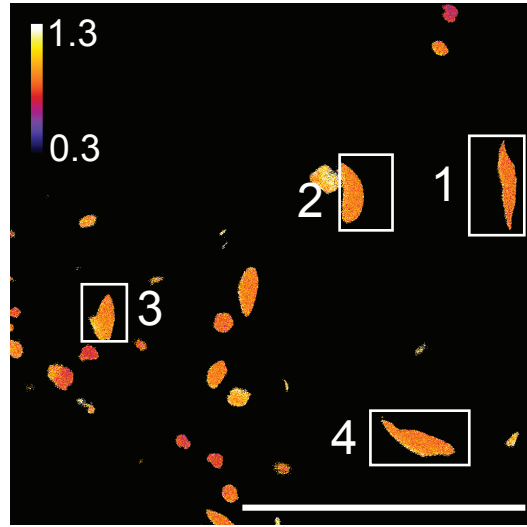

ROIs for Fig. 5B

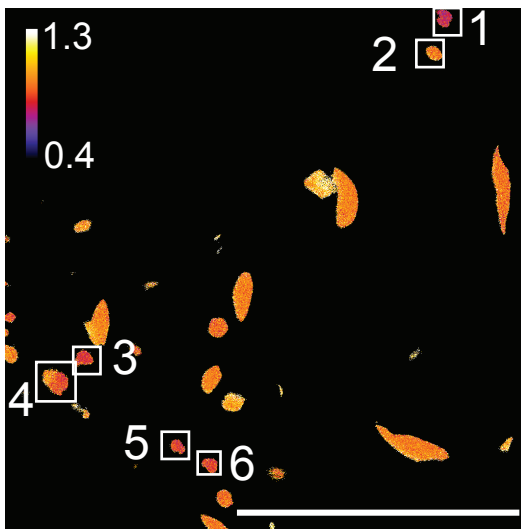

ROIs for Fig. 5C

**Fig. S20. ROIs for Figure 5.**

The ROIs used to collect YPet and Turquoise GL emission intensity values are indicated by white rectangles.
