# Supplementary material
Source: PubMed Central journal article supplement (PMC6750906)

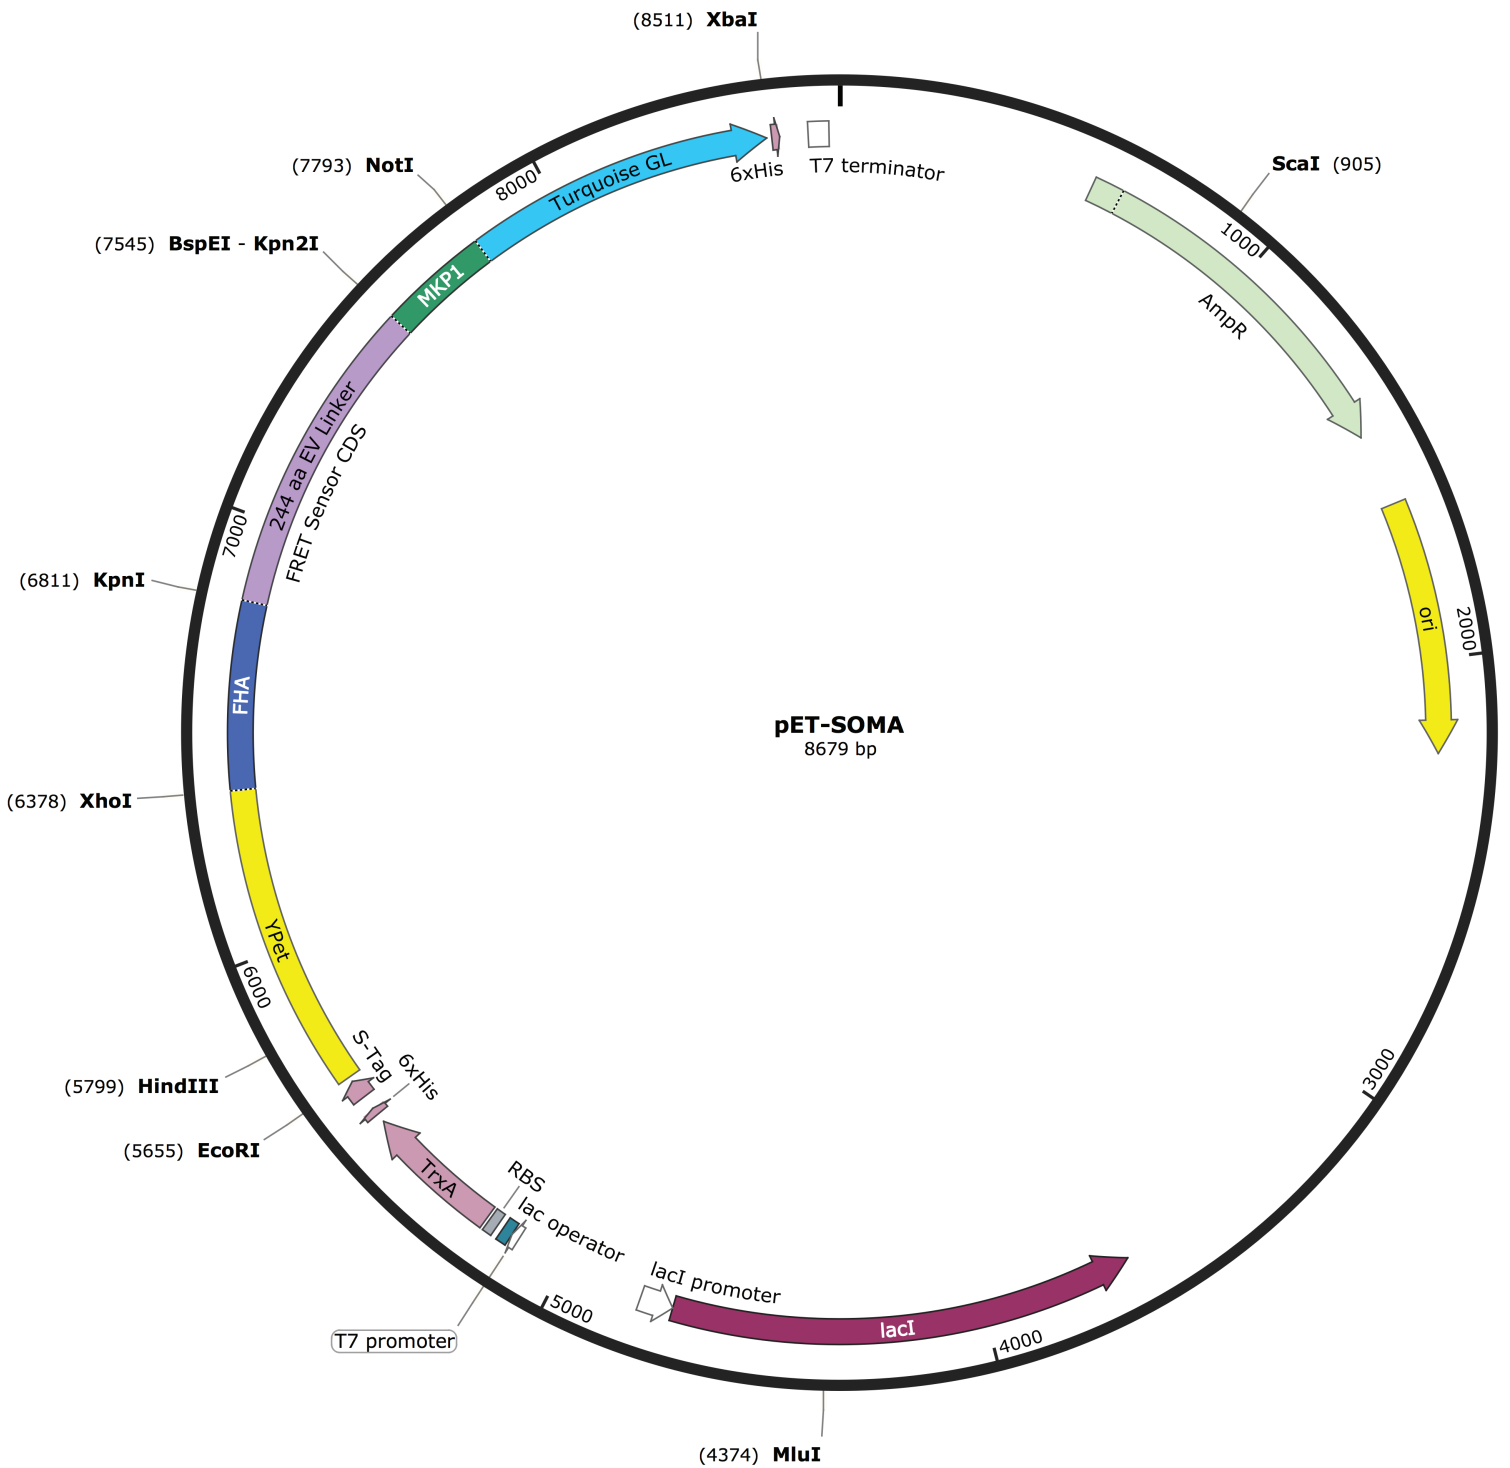

Fig. S11. Plasmid map for pET-SOMA.

Supplement: NIHMS1023700-supplement-S11.pdf [file NIHMS1023700-supplement-S11.pdf]

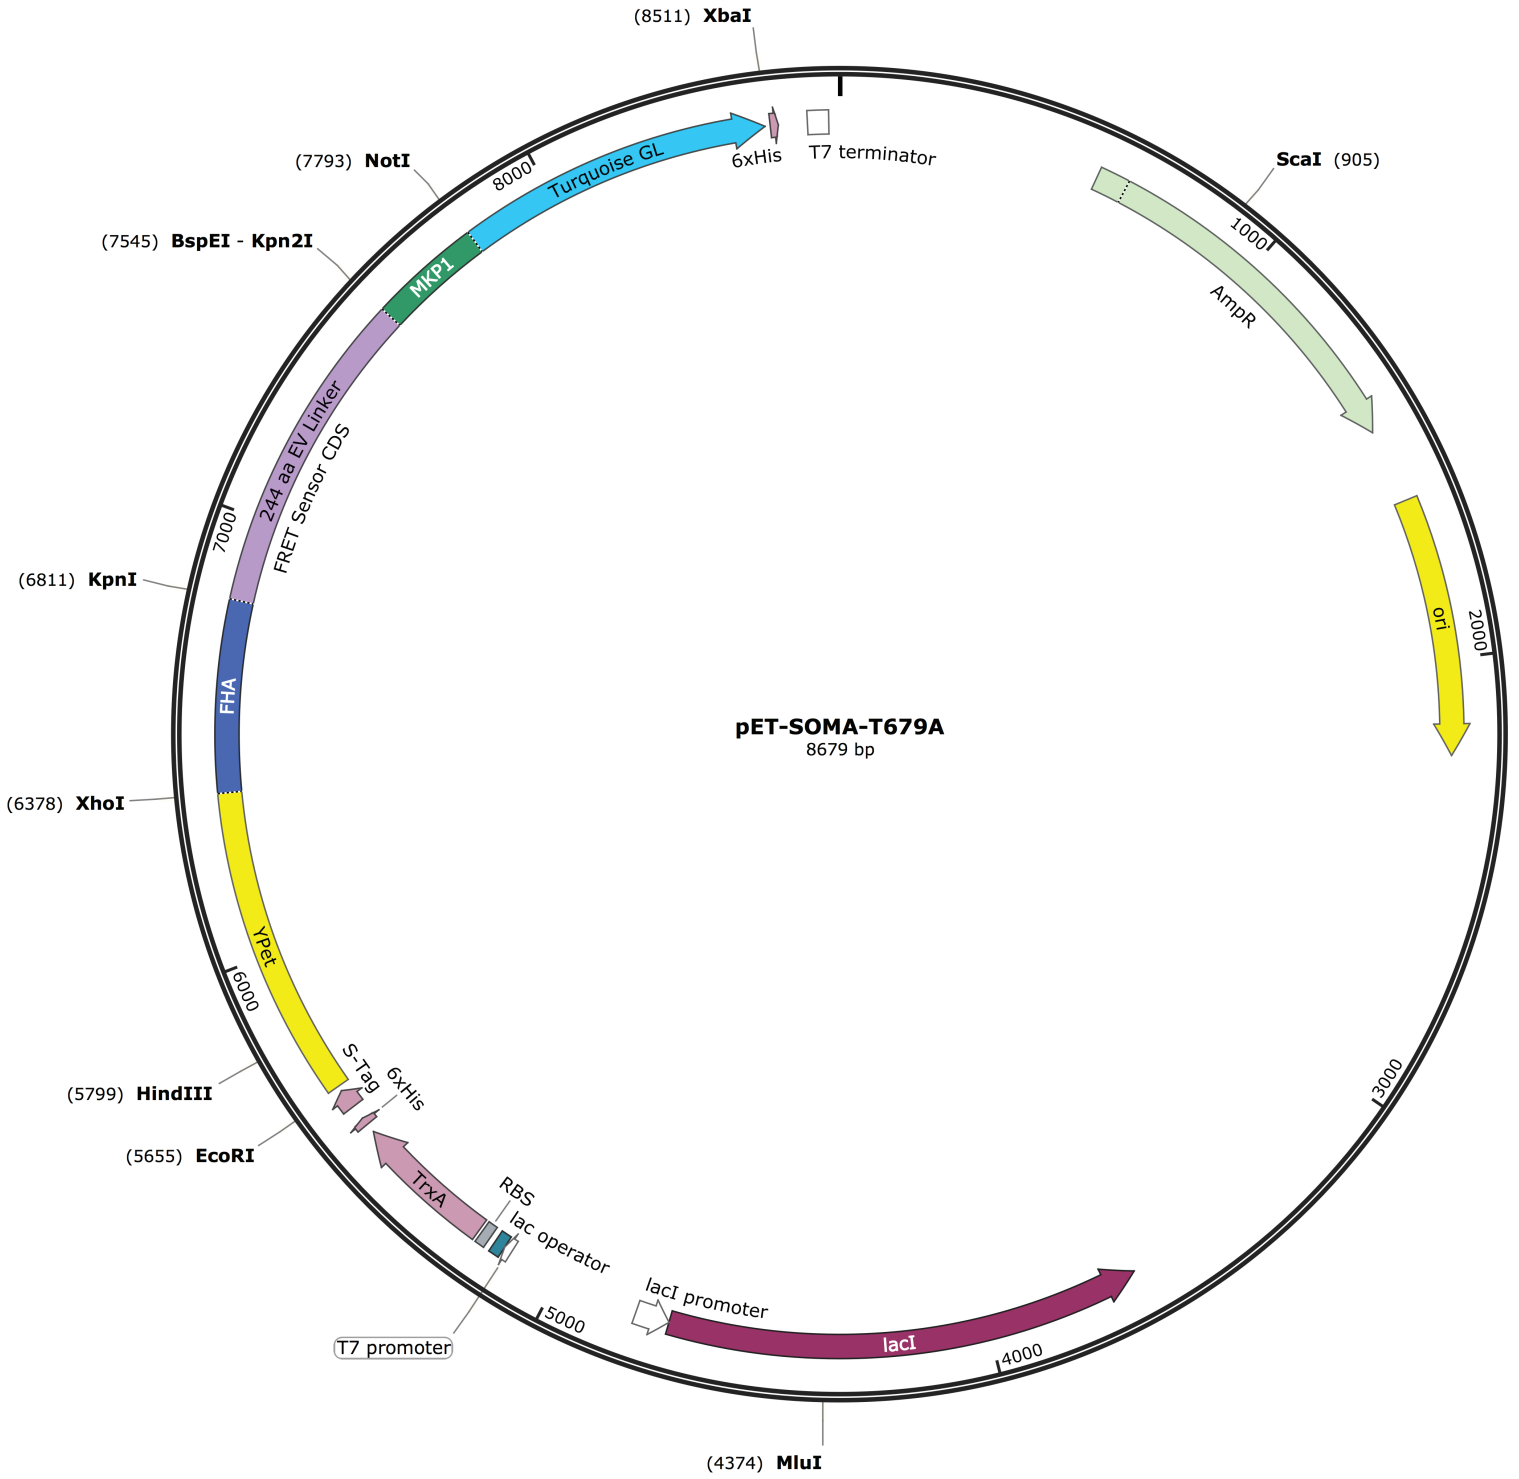

Fig. S12. Plasmid map for pET-SOMA-T679A.

Supplement: NIHMS1023700-supplement-S12.pdf [file NIHMS1023700-supplement-S12.pdf]

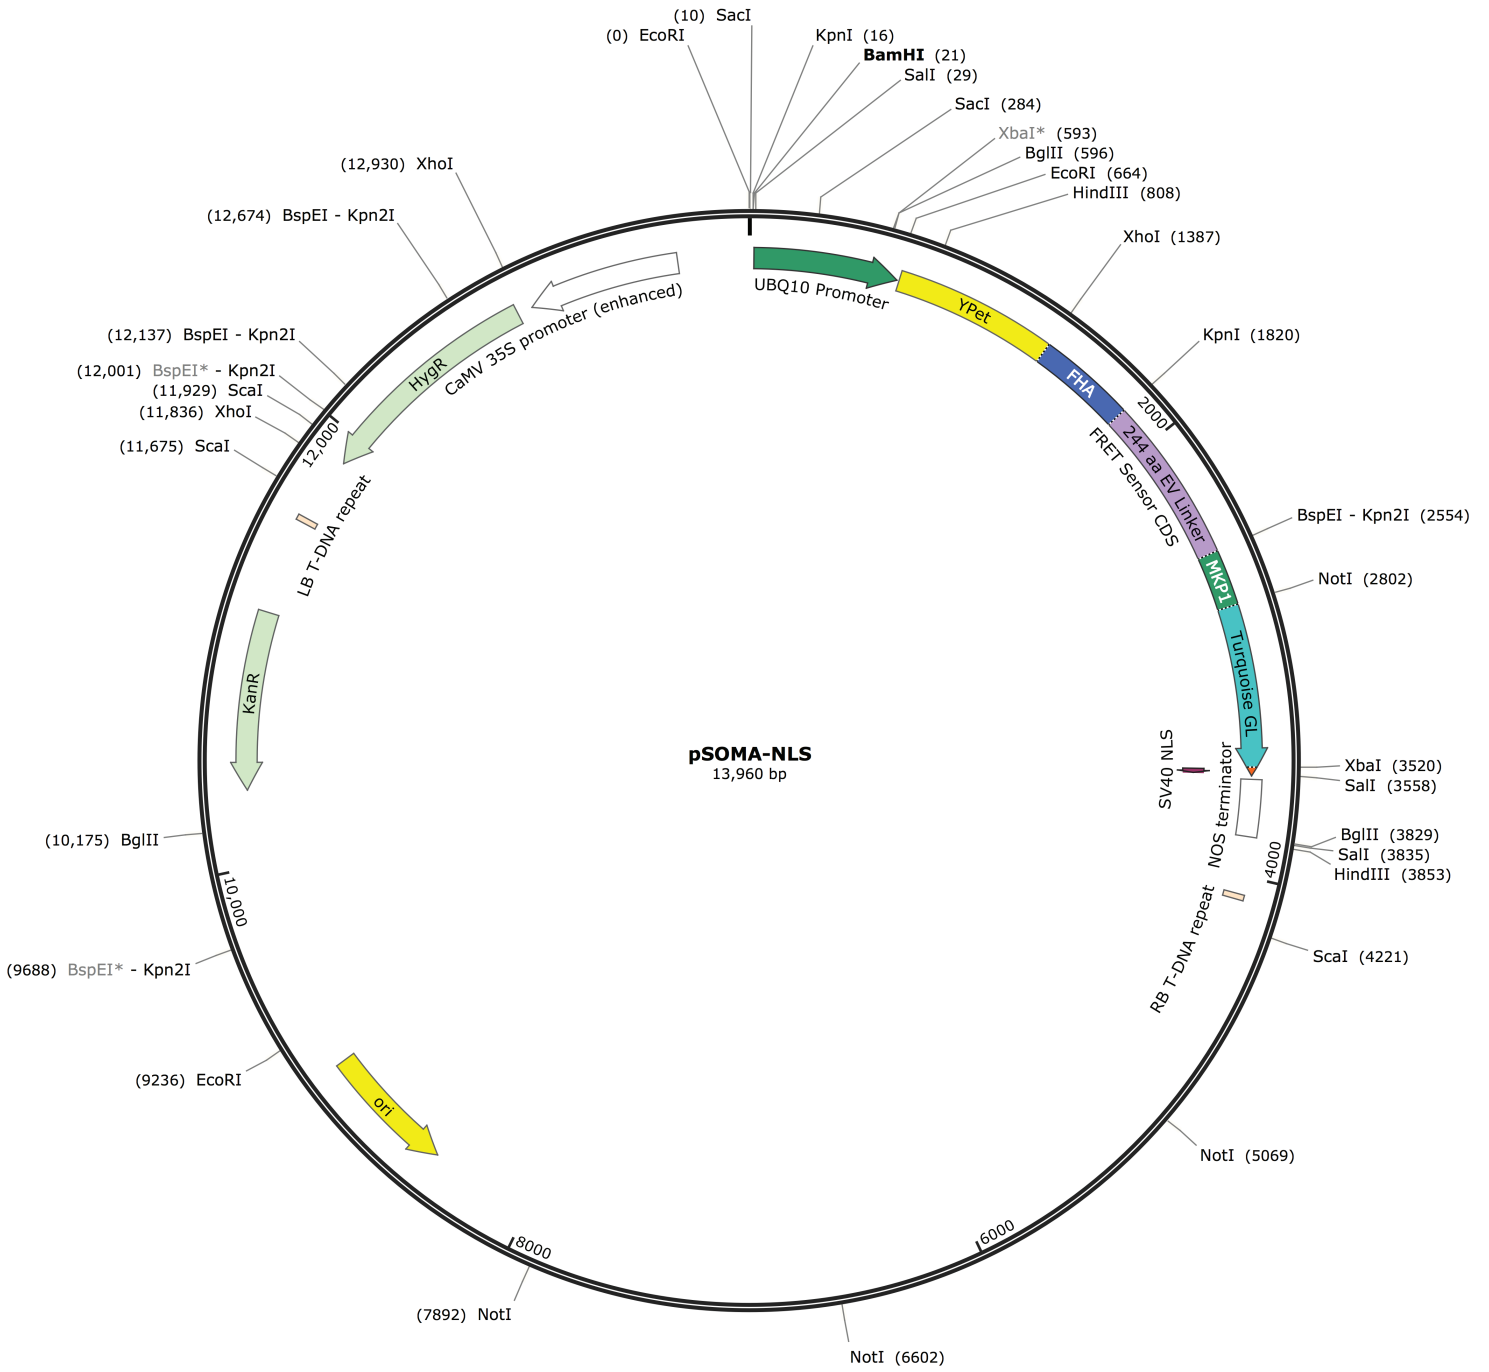

Fig. S13. Plasmid map for pSOMA-NLS.

Supplement: NIHMS1023700-supplement-S13.pdf [file NIHMS1023700-supplement-S13.pdf]

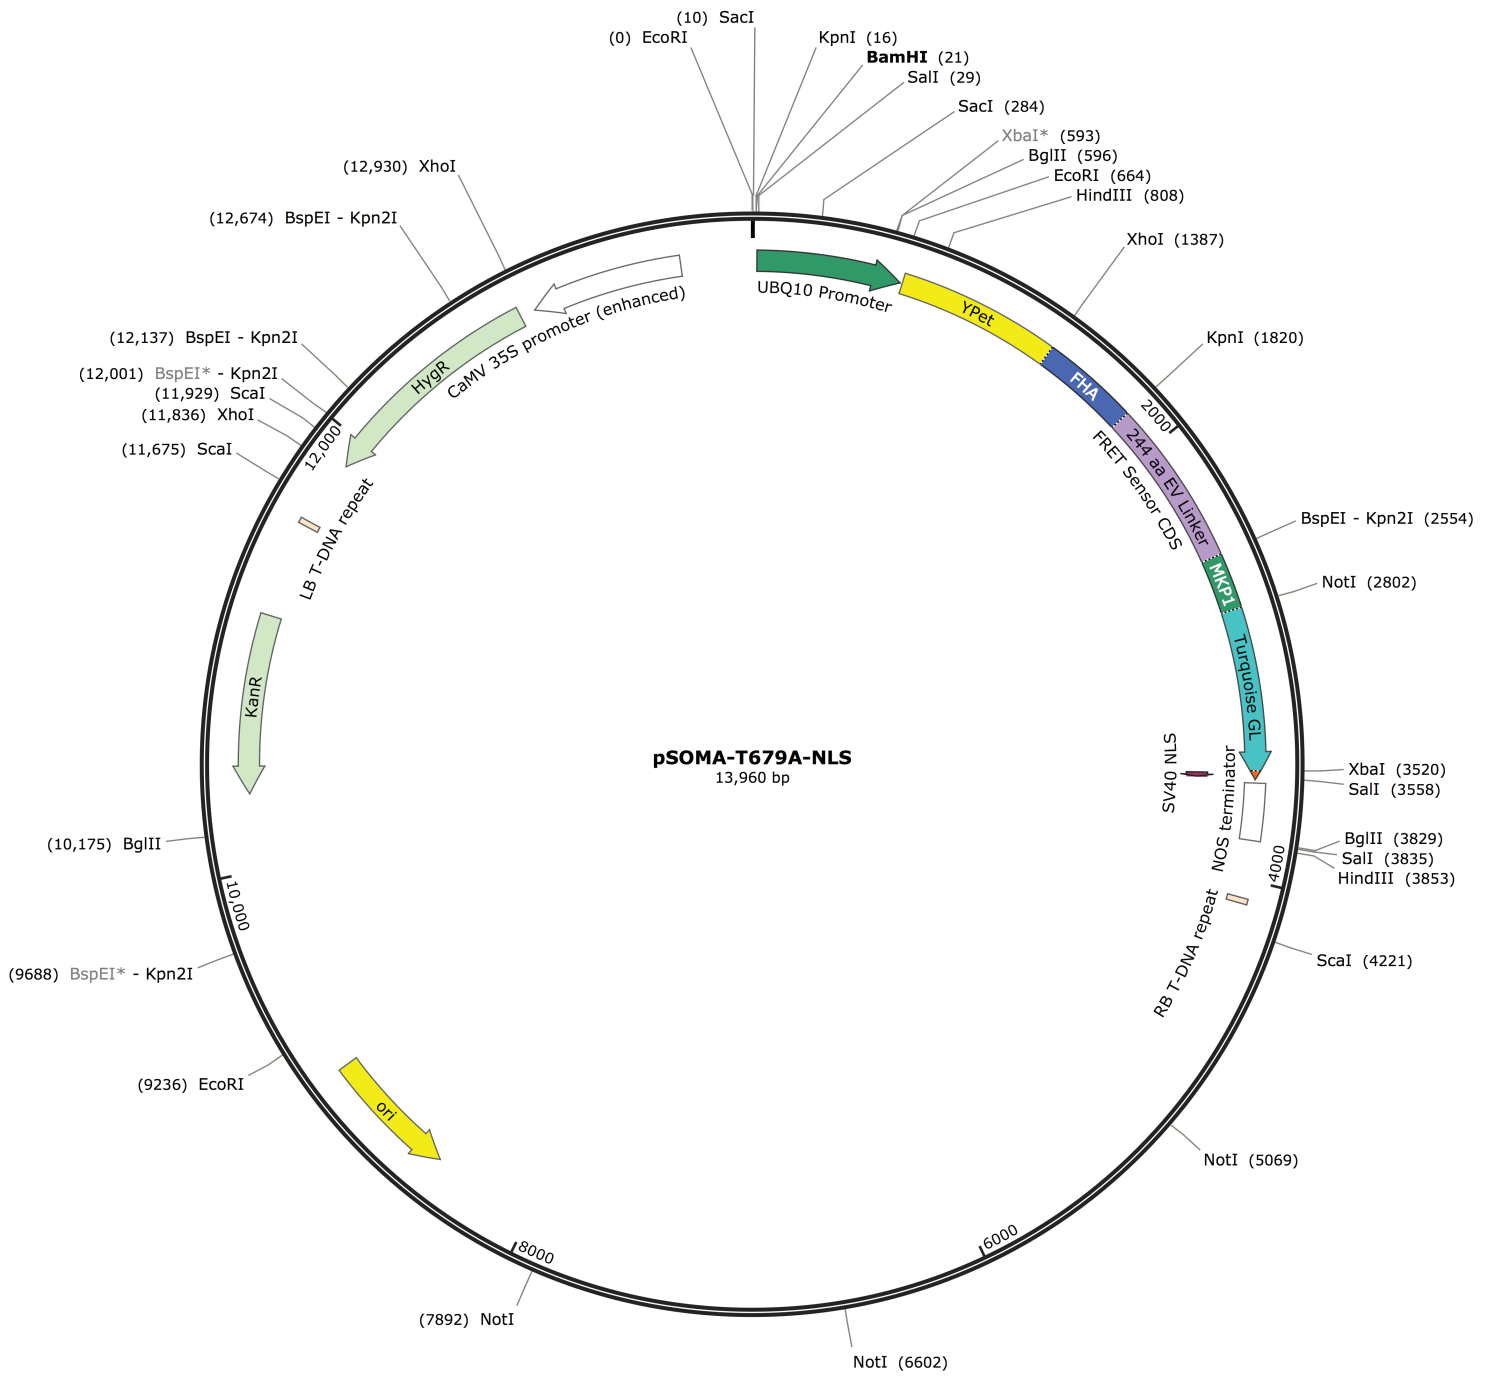

**Fig. S14. Plasmid map for pSOMA-T679A-NLS.**

Supplement: NIHMS1023700-supplement-S14.pdf [file NIHMS1023700-supplement-S14.pdf]

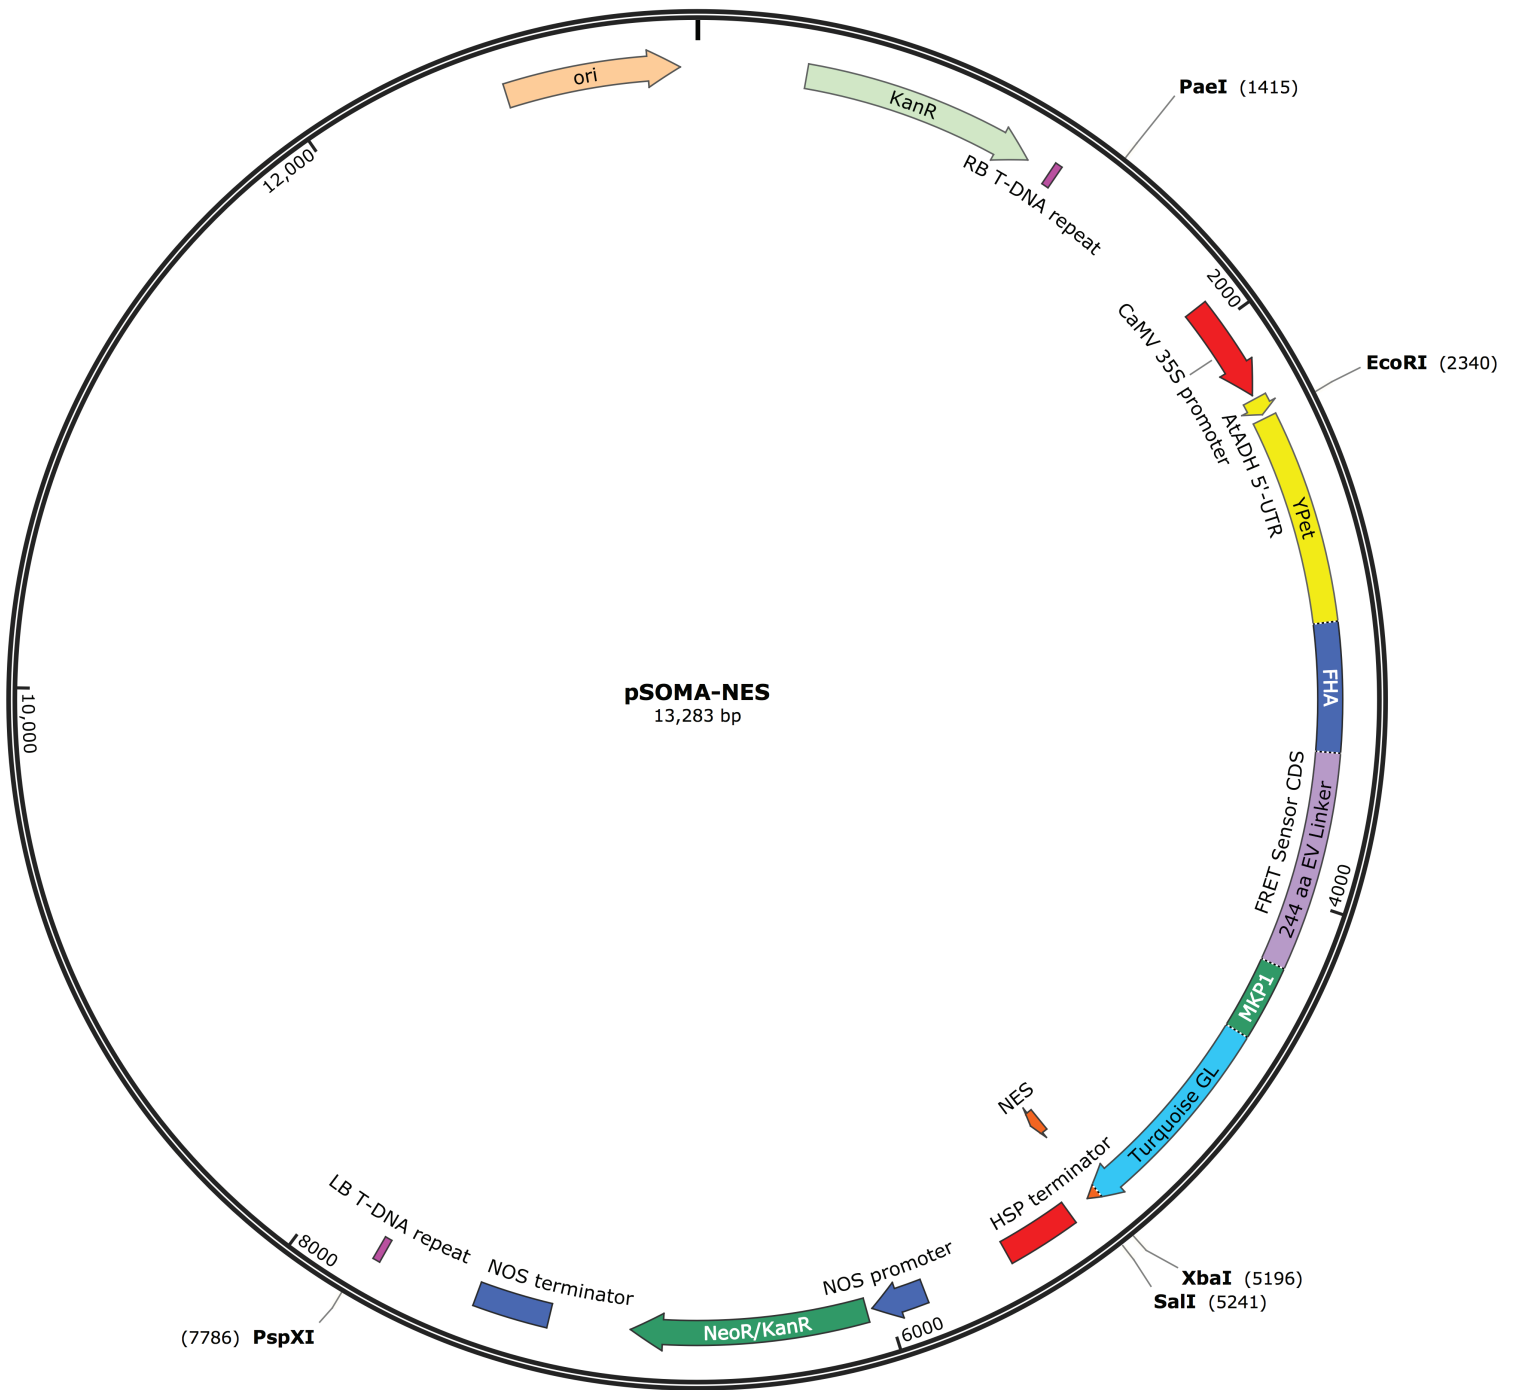

Fig. S15. Plasmid map for pSOMA-NES.

Supplement: NIHMS1023700-supplement-S15.pdf [file NIHMS1023700-supplement-S15.pdf]

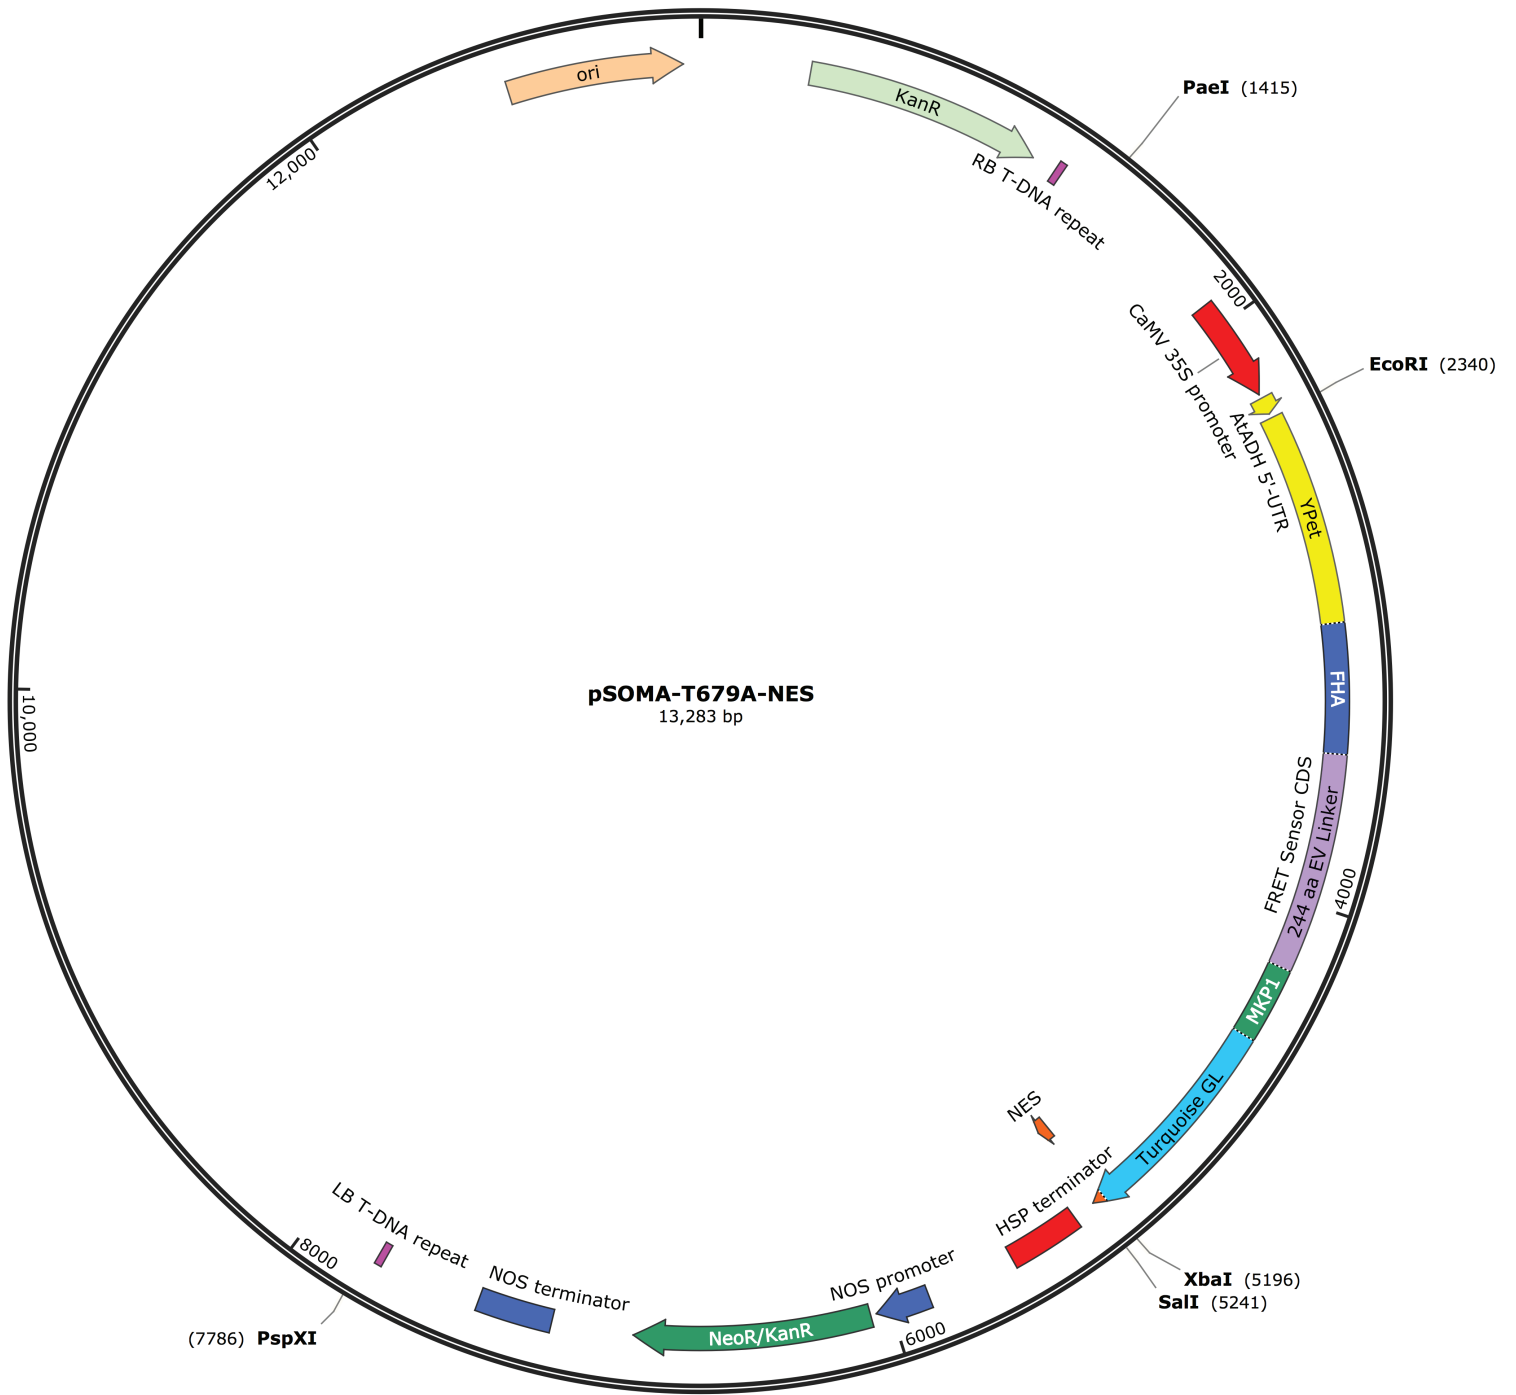

Fig. S16. Plasmid map for pSOMA-T679A-NES.

Supplement: NIHMS1023700-supplement-S16.pdf [file NIHMS1023700-supplement-S16.pdf]
